# Supplementary material
Source: Springer Nature journal article supplement (https://www.springermedizin.de/resource/supplementary/12889_2014_7114_MOESM4_ESM.pdf/9499886)
Supplement: MOESM4 [file 9499886]

**Table 2. Correlations between SAHL-D, SAHL-D22, NVS-D, vocabulary and prose literacy**

|                   | Rec22 | Com22  | SAHL-D22 | Rec  | Com    | SAHL-D | NVS-D | Voc   | Prose |
|-------------------|-------|--------|----------|------|--------|--------|-------|-------|-------|
| Recognition22     | -     |        |          |      |        |        |       |       |       |
| Comprehension22   | 0.59  | -      |          |      |        |        |       |       |       |
| SAHL-D22          | 0.88  | 0.90   | -        |      |        |        |       |       |       |
| Recognition       | 0.98  | 0.58   | 0.87     | -    |        |        |       |       |       |
| Comprehension     | 0.64  | 0.96   | 0.90     | 0.63 | -      |        |       |       |       |
| SAHL-D            | 0.87  | 0.88   | 0.98     | 0.87 | 0.93   | -      |       |       |       |
| Newest Vital Sign | 0.49  | 0.44   | 0.52     | 0.48 | 0.48   | 0.53   | -     |       |       |
| Vocabulary        | 0.50  | 0.54   | 0.58     | 0.53 | 0.57   | 0.61   | 0.30  | -     |       |
| Prose literacy    | 0.55  | 0.48   | 0.57     | 0.53 | 0.52   | 0.58   | 0.49  | 0.55  |       |
| HLSEU             |       | 0.25** | 0.21**   |      | 0.27** | 0.22** | 0.20* | 0.20* | 0.17* |

Rec = recognition; Com = comprehension; NVS-D = Newest Vital Sign, Dutch version; Voc = vocabulary; Prose = prose literacy

All unmarked correlations:  $p < .001$ ; \*\*  $p < .01$ ; \*  $p < .05$

$n = 272$  for all variables except HLSEU ( $n = 166$ )
